# Supplementary material
Source: Springer Nature journal article supplement (https://www.springermedizin.de/resource/supplementary/12936_2012_2770_MOESM1_ESM.pdf/9544170)

Gametocyte production as % of control

250  
200  
150  
100  
50  
0

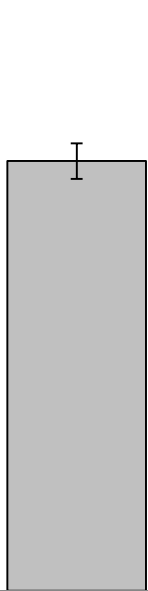

CT

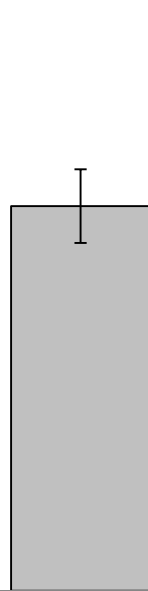

Mas 7

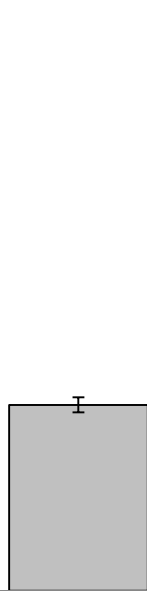

Mas 17

Supplement: MOESM1 [file 9544170]
